# Supplementary material for: Palladium complexes of 6-aminofulvene-2-aldiminate (AFA) ligands
Source: Royal Society of Chemistry journal article supplement (doi:10.1039/b914707a), 2009-12-05

Paper ref. : B914707A

$^{13}\text{C}$  nmr spectrum of  $[(^t\text{Bu}_2\text{AFA})_2\text{Pd}]$  **5** showing the small amount of free ligand contaminant resulting in unsatisfactory elemental analysis for this complex.

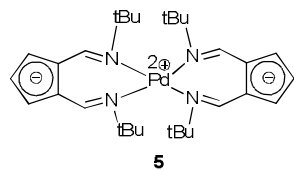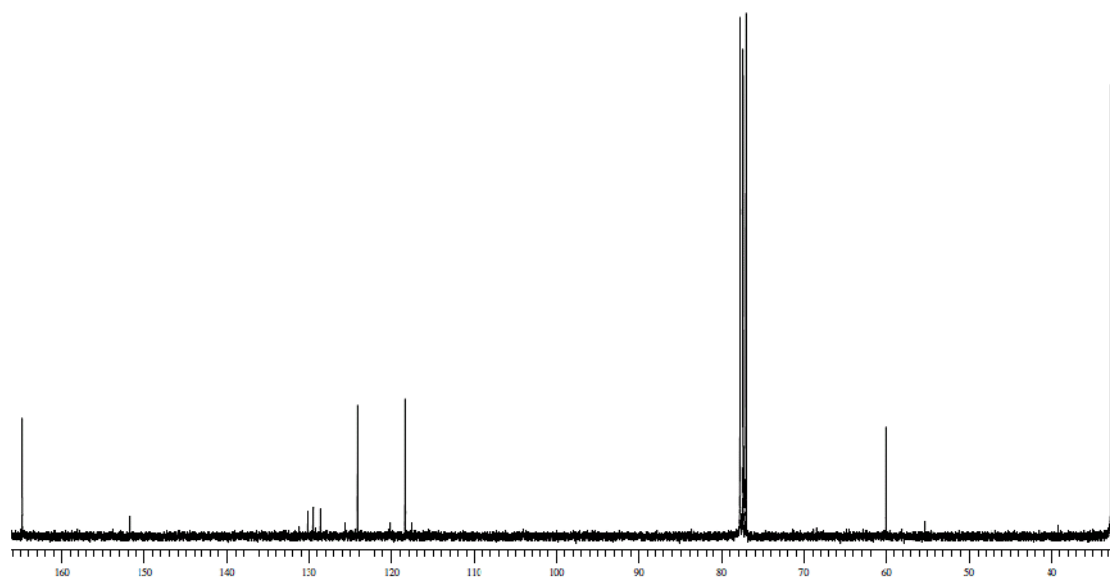

Supplement: b914707a.pdf [file b914707a.pdf]
